# Supplementary material for: Palladium dichloride adduct of N,N-bis-(diphenylphosphanylmethyl)-2-aminopyridine: synthesis, structure and catalytic performance in the decarboxylative cross-coupling of 4-picolinic acid with aryl bromide
Source: Royal Society of Chemistry journal article supplement (doi:10.1039/c4dt00815d), 2014-01-01

## Electronic Supplementary Information (ESI)

**Palladium dichloride adduct of *N,N*-bis-(diphenylphosphanylmethyl)-2-aminopyridine: synthesis, structure and catalytic performance in the decarboxylative cross-coupling of 4-picolinic acid with aryl bromide**

**Run-Tian He,<sup>a</sup> Jian-Feng Wang,<sup>a</sup> Hui-Fang Wang,<sup>a</sup> Zhi-Gang Ren<sup>\*,a</sup> and Jian-Ping Lang<sup>\*,a,b</sup>**

<sup>a</sup> College of Chemistry, Chemical Engineering and Material Science, Soochow University, Suzhou 215123, People's Republic of China

<sup>b</sup> State Key Laboratory of Organometallic Chemistry, Shanghai Institute of Organic Chemistry, Chinese Academy of Sciences, Shanghai 210032, People's Republic of China

**Figure S1.**  $^1\text{H}$  NMR (a),  $^{13}\text{C}$  NMR (b) and  $^{31}\text{P}$  NMR (c) spectra of **1**.

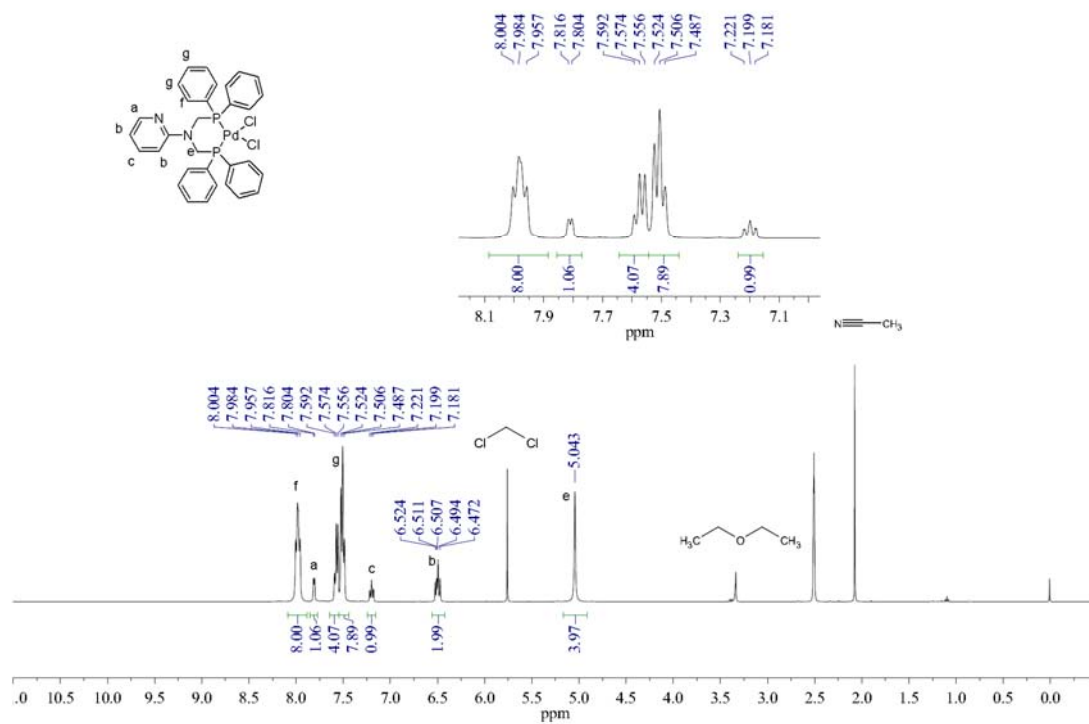

(a)

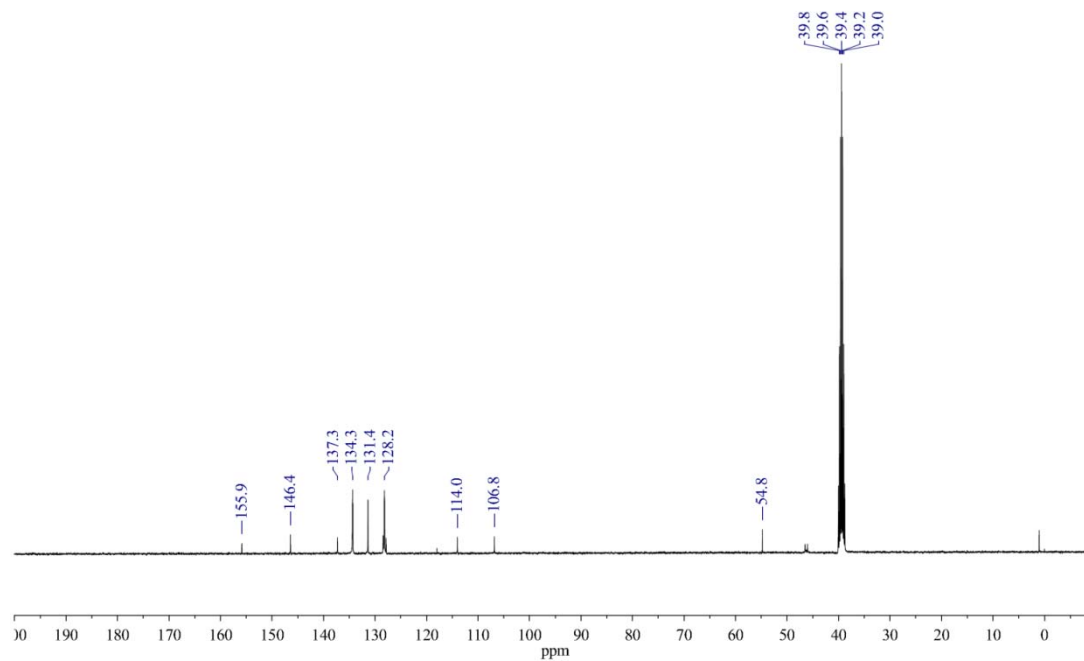

(b)

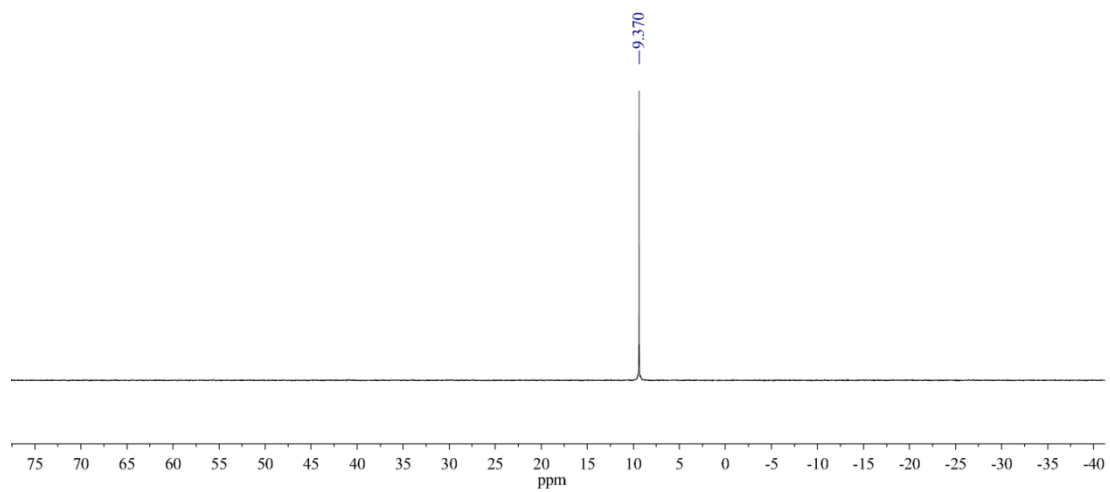

(c)

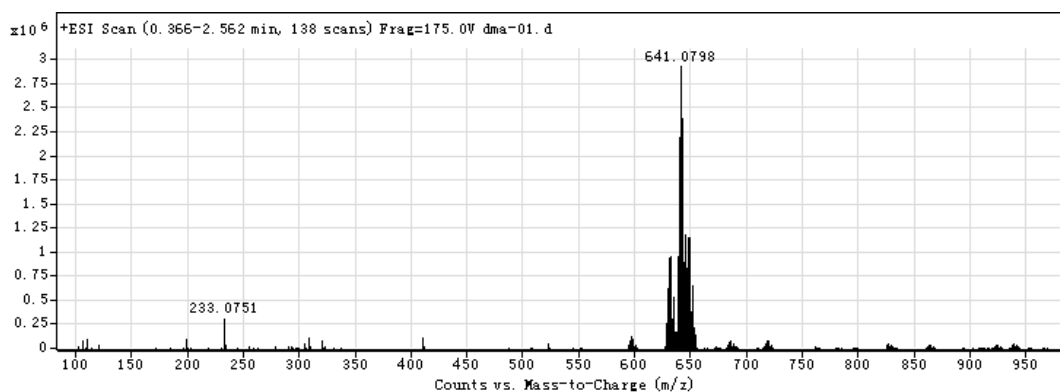

**Figure S2** Positive-ion ESI-MS of the mixture of PdCl<sub>2</sub> and bdppmapy in DMA.

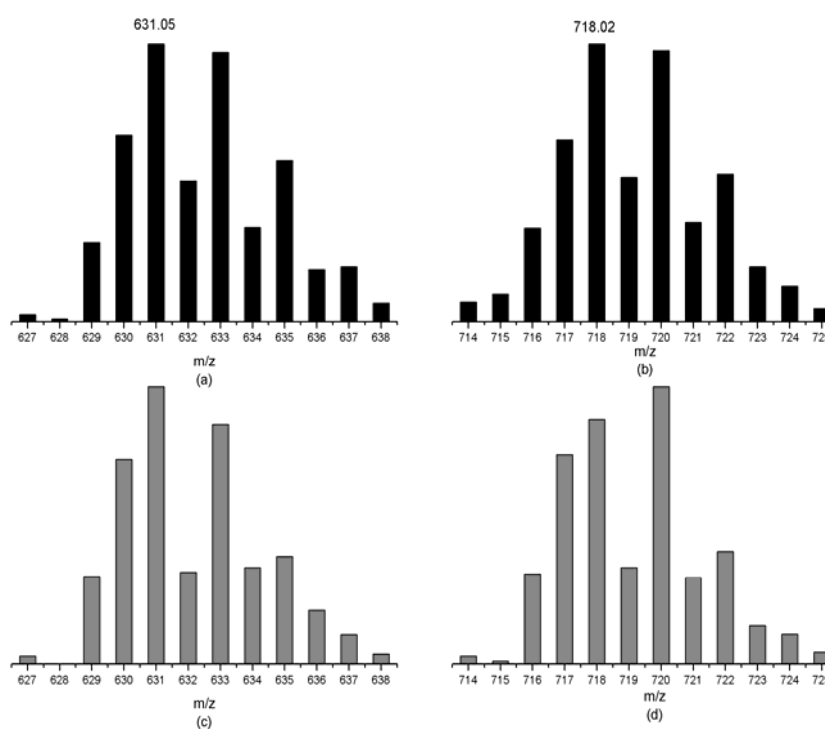

**Figure S3.** Observed (a and b) and calculated (c and d) isotopic patterns for the [(bdppmapy)PdCl]<sup>+</sup> cation and the {(bdppmapy)PdCl}·DMA<sup>+</sup> cation in the mixture of PdCl<sub>2</sub> and bdppmapy in DMA.

## Computational details

Density functional theory calculations were performed using Gaussian 09<sup>1</sup> with spin-restricted method. All structure optimizations were performed using the B3LYP functional<sup>2</sup> with the standard Pople all-electron basis set 6-31G(d) for all the atoms except for Pd and Br (which were described by LANL2DZ basis set and effective core potential implemented<sup>3</sup>). Frequency analysis was conducted at the same level of theory to verify the stationary points to be real minima and to get the zero-point energy (ZPE) corrections. Single-point calculations were performed with a large basis set, *i.e.* SDD for Pd, Br atoms and 6-311+G(2d,p) for the rest atoms. Basis set superposition errors were corrected for the [Cu]-[Pd] intermediates at the larger basis set level.

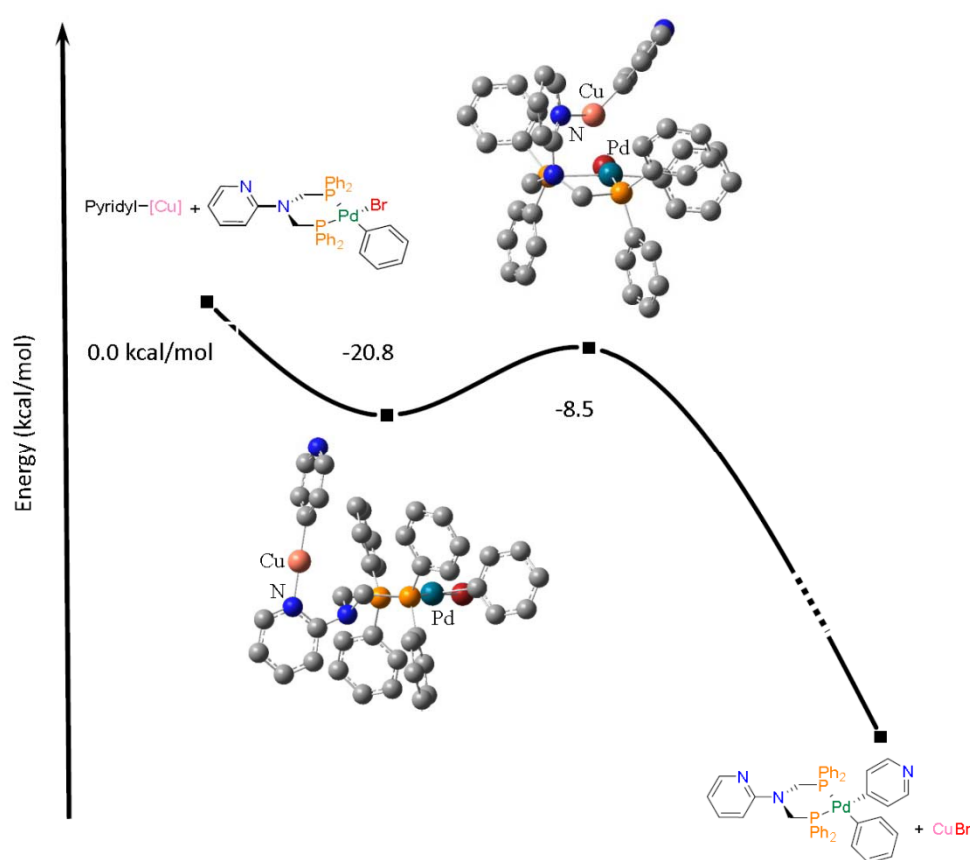

**Figure S4** Structures and energies calculated by DFT (B3LYP/DZVP/TZVP). Gibbs free energy (G) in kcal·mol<sup>-1</sup>.

## Coordinates and energies of computed structures

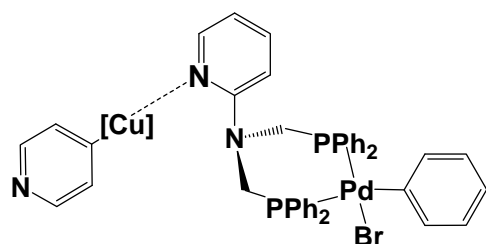

### TS for the Palladium(II)-Copper(I) complex (minimum)

E = -4252.15516689 a.u.

ZPE correction = 0.683472 a.u.

BSSSE correction = 0.045704154 a.u.

|    |             |             |             |
|----|-------------|-------------|-------------|
| Pd | -1.74898677 | 0.42778128  | -0.57492605 |
| Cu | 3.85926514  | -0.93702709 | 0.52641392  |
| Br | -3.00200116 | 2.33125424  | -1.79111236 |
| P  | 0.16741494  | 1.90651300  | -0.29441828 |
| P  | -0.85682280 | -1.33279364 | 0.62216206  |
| N  | 4.63776782  | -2.59468544 | -3.84916852 |
| N  | 3.52373461  | -0.34311675 | 2.28397727  |
| N  | 1.29210977  | 0.18161653  | 1.60804962  |
| C  | -2.78392427 | -0.52842940 | 4.16554334  |
| C  | -2.60423453 | -1.69357130 | 4.91254616  |
| C  | -2.28678968 | -0.44827792 | 2.86274625  |
| C  | -1.92057184 | -2.77764844 | 4.35593493  |
| C  | -1.59959572 | -1.53114374 | 2.29541546  |
| C  | -1.41687064 | -2.69679517 | 3.05750391  |
| C  | -5.58196049 | -2.40392746 | -1.57593230 |
| C  | -5.52155348 | -1.74788263 | -0.34604662 |
| C  | 4.84730487  | -1.31001623 | -3.53146203 |
| C  | 4.63857617  | -0.77653032 | -2.25824650 |
| C  | -4.53775831 | -2.24466738 | -2.49015714 |
| C  | -4.42110599 | -0.94096206 | -0.02917816 |
| C  | 4.20704866  | -3.37955961 | -2.85302779 |
| C  | 4.17898513  | -1.58029217 | -1.19256206 |
| C  | 3.97219730  | -2.93041090 | -1.55198712 |
| C  | -3.43833432 | -1.44117775 | -2.17371338 |
| C  | -3.37029027 | -0.78254825 | -0.93935975 |
| C  | -2.01968651 | -5.08487948 | -0.63140866 |
| C  | -1.97481905 | -3.85293010 | 0.02062934  |
| C  | -1.55598586 | 4.72056139  | 2.16978056  |
| C  | -1.34835992 | 3.62223746  | 1.33116121  |
| C  | -0.97593731 | -5.47632210 | -1.47211020 |
| C  | -0.87289187 | -2.99834281 | -0.15067943 |
| C  | -0.50995796 | 5.60147078  | 2.44428635  |
| C  | -0.08722113 | 3.39236641  | 0.76393716  |
| C  | 4.47984886  | -0.39193919 | 3.23627809  |
| C  | 4.25679738  | 0.01778096  | 4.54505642  |

---

|   |             |             |             |
|---|-------------|-------------|-------------|
| C | 2.99367546  | 0.49737401  | 4.89193890  |
| C | 2.29450473  | 0.12679215  | 2.62132828  |
| C | 2.20991986  | 2.11879629  | -3.86676615 |
| C | 2.00077962  | 0.55107160  | 3.91446053  |
| C | 1.93186590  | 3.40966070  | -4.32009928 |
| C | 1.70109141  | 1.68060216  | -2.64423824 |
| C | 1.66494908  | 1.11658511  | 0.52419305  |
| C | 1.13665688  | 4.25740932  | -3.54758959 |
| C | 0.95706781  | 4.29323647  | 1.03571410  |
| C | 0.95533642  | -1.16129995 | 1.09860252  |
| C | 0.91642480  | 2.53523801  | -1.85123228 |
| C | 0.74749451  | 5.38931743  | 1.87127535  |
| C | 0.62769996  | 3.82483689  | -2.32227897 |
| C | 0.16158620  | -3.38938412 | -1.01743103 |
| C | 0.11031487  | -4.62277874 | -1.66837259 |
| H | -3.31912861 | 0.31646230  | 4.59024585  |
| H | -2.99874068 | -1.75991854 | 5.92294019  |
| H | -2.43464232 | 0.45434686  | 2.27639237  |
| H | -1.78144950 | -3.68876272 | 4.93167797  |
| H | -0.89359650 | -3.54882482 | 2.63277947  |
| H | -6.43721607 | -3.02806201 | -1.82343547 |
| H | -6.33272833 | -1.85568986 | 0.37132713  |
| H | 5.20614547  | -0.67315390 | -4.34146283 |
| H | 4.84148702  | 0.28324671  | -2.11134327 |
| H | -4.57805768 | -2.74239454 | -3.45667066 |
| H | -4.40169737 | -0.43412847 | 0.93163896  |
| H | 4.04529699  | -4.42768887 | -3.11021487 |
| H | 3.62727690  | -3.65748864 | -0.81754797 |
| H | -2.88036362 | -5.73252348 | -0.48987534 |
| H | -2.80760469 | -3.55052889 | 0.64681168  |
| H | -2.64222579 | -1.32103581 | -2.90377917 |
| H | -2.54056975 | 4.89113463  | 2.59643890  |
| H | -2.17217099 | 2.96036966  | 1.08418959  |
| H | -1.01537139 | -6.43528563 | -1.98149246 |
| H | -0.67361791 | 6.45805443  | 3.09290268  |
| H | -0.00329091 | 4.48724386  | -1.73988563 |
| H | 5.44611968  | -0.77391277 | 2.92471989  |
| H | 5.05954733  | -0.04155411 | 5.27211932  |
| H | 2.81927183  | 1.44437277  | -4.46185974 |
| H | 2.78382936  | 0.82408644  | 5.90611531  |
| H | 2.32511093  | 3.74896810  | -5.27455086 |
| H | 2.28517884  | 0.59705298  | -0.22252487 |
| H | 2.27680903  | 1.91514849  | 0.95125883  |
| H | 1.93306451  | 4.15428601  | 0.57716566  |

---

|   |            |             |             |
|---|------------|-------------|-------------|
| H | 1.91895796 | 0.66465315  | -2.32820698 |
| H | 1.61533396 | -1.42789116 | 0.25984985  |
| H | 1.56177478 | 6.08146746  | 2.06898340  |
| H | 1.12970896 | -1.89401815 | 1.89167728  |
| H | 1.01062391 | -2.74167635 | -1.21048590 |
| H | 0.99997660 | 0.91015158  | 4.12376188  |
| H | 0.92189493 | -4.90663567 | -2.33239146 |
| H | 0.90197810 | 5.25786663  | -3.90062276 |

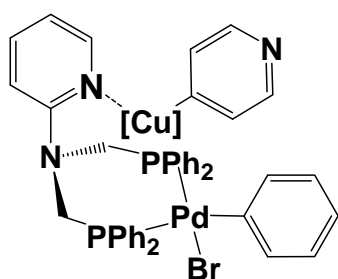

**TS for the palladium(II)-copper(I) complex  
(minimum)**

E = -4252.135951 a.u.

ZPE correction = 0.683225 a.u.

BSSE correction = 0.061643586 a.u.

|    |             |             |             |
|----|-------------|-------------|-------------|
| Pd | -0.07245200 | 0.59270400  | -0.75022500 |
| Cu | 0.28799900  | -1.92093100 | 0.23698100  |
| Br | 1.33257300  | 0.84205000  | -2.92080700 |
| P  | 2.03991200  | 0.73175700  | 0.50794800  |
| P  | -1.51973900 | 0.83713600  | 1.06404000  |
| N  | -0.91009800 | -4.92783200 | -3.26151700 |
| N  | 0.79492800  | -2.15545200 | 2.10119500  |
| N  | 0.58632000  | 0.07083100  | 2.90291800  |
| C  | -3.88538600 | 4.07610600  | 2.11810400  |
| C  | -3.41833200 | 2.77103500  | 1.95267600  |
| C  | -3.20338300 | 5.14621700  | 1.53566500  |
| C  | -2.26395000 | 2.52057100  | 1.19356000  |
| C  | -2.05095700 | 4.90752800  | 0.78445600  |
| C  | -1.58502900 | 3.60317000  | 0.61203700  |
| C  | -1.42353600 | -4.97665200 | -2.02588100 |
| C  | -1.11943100 | -4.05868600 | -1.01817700 |
| C  | -0.22389000 | -2.98854300 | -1.24344100 |
| C  | -0.06803700 | -3.91139400 | -3.50068300 |
| C  | -5.17181600 | -0.97811200 | 0.51375500  |
| C  | -5.13743500 | -2.06816300 | 1.38550300  |
| C  | -4.08867400 | -0.10358100 | 0.43255100  |
| C  | -4.01091300 | -2.28034000 | 2.18012400  |
| C  | -3.96748400 | 0.88388500  | -3.66397000 |
| C  | -3.50223000 | -0.35871800 | -3.23096200 |
| C  | -3.31600500 | 2.04387900  | -3.24045200 |



---

|   |             |             |             |
|---|-------------|-------------|-------------|
| C | -2.95224800 | -0.30242400 | 1.23667100  |
| C | -2.92578200 | -1.40442700 | 2.10614700  |
| C | -2.40270600 | -0.44529100 | -2.36877100 |
| C | -2.20937800 | 1.96033700  | -2.38722500 |
| C | -1.75187400 | 0.71588200  | -1.94044700 |
| C | -0.65407700 | 0.80019400  | 2.77597600  |
| C | 0.28918200  | -2.94822800 | -2.55548300 |
| C | 5.64982700  | -1.26905400 | 0.77514400  |
| C | 5.49899100  | -2.29921000 | -0.15825700 |
| C | 4.62171100  | -0.34717500 | 0.96926000  |
| C | 4.45129900  | 3.82993500  | -0.80079300 |
| C | 4.32034300  | -2.40071800 | -0.89709500 |
| C | 3.91217200  | 2.56133500  | -0.58320900 |
| C | 3.90978600  | 4.94739700  | -0.16406600 |
| C | 3.42685100  | -0.44735100 | 0.23503600  |
| C | 3.28815800  | -1.47850000 | -0.70358700 |
| C | 2.82209900  | 2.38985800  | 0.28373600  |
| C | 2.81413100  | 4.79142800  | 0.68661200  |
| C | 2.27080300  | 3.52458200  | 0.90223800  |
| C | 1.80942800  | 0.67328100  | 2.39389600  |
| C | 0.93224400  | -3.47782200 | 2.36600600  |
| C | 0.78187900  | -4.01655300 | 3.63602900  |
| C | 0.57452100  | -1.31733100 | 3.14047800  |
| C | 0.47425200  | -3.15941600 | 4.69541600  |
| C | 0.38628700  | -1.79383100 | 4.44398200  |
| H | -4.78452200 | 4.25467100  | 2.70177800  |
| H | -3.96416800 | 1.94816500  | 2.40382100  |
| H | -3.57146800 | 6.16068100  | 1.66262000  |
| H | -2.11725200 | -5.79656300 | -1.82975100 |
| H | -1.60559100 | -4.19051000 | -0.05126400 |
| H | -1.51959100 | 5.73340300  | 0.31947000  |
| H | -0.69720100 | 3.41940200  | 0.01288400  |
| H | -0.46110500 | 1.85294000  | 3.01126500  |
| H | -6.04020700 | -0.80944900 | -0.11658600 |
| H | -5.98121900 | -2.75034300 | 1.44114100  |
| H | -4.82254100 | 0.94829600  | -4.33266900 |
| H | -4.12879000 | 0.73000300  | -0.25977500 |
| H | -3.98969000 | -1.27256500 | -3.56345600 |
| H | -3.97137200 | -3.12690500 | 2.86019300  |
| H | -3.65765700 | 3.01938400  | -3.58039200 |
| H | -2.06199400 | -1.59571800 | 2.73402500  |
| H | -2.05293400 | -1.41905000 | -2.04728200 |
| H | 1.85020000  | 1.70270700  | 2.76751100  |
| H | -1.70442300 | 2.87461200  | -2.09294000 |

---

|   |             |             |             |
|---|-------------|-------------|-------------|
| H | -1.37705200 | 0.43290500  | 3.51207700  |
| H | 0.94688000  | -2.14205400 | -2.87320600 |
| H | 0.33984000  | -3.86045000 | -4.51108700 |
| H | 6.56998700  | -1.17947200 | 1.34651900  |
| H | 6.30248400  | -3.01468800 | -0.31189700 |
| H | 5.29421800  | 3.94260700  | -1.47700600 |
| H | 4.76171300  | 0.46216900  | 1.68174900  |
| H | 4.33543800  | 1.70587400  | -1.09707300 |
| H | 4.33225100  | 5.93362600  | -0.33571200 |
| H | 4.19669900  | -3.19192100 | -1.63097900 |
| H | 2.65765700  | 0.14012700  | 2.83215600  |
| H | 2.37958200  | -1.55261700 | -1.28893200 |
| H | 2.37678300  | 5.65523800  | 1.18046100  |
| H | 1.40048100  | 3.43548900  | 1.54676100  |
| H | 1.15168900  | -4.10716300 | 1.51024100  |
| H | 0.89439000  | -5.08512600 | 3.78453300  |
| H | 0.34111100  | -3.54389400 | 5.70245400  |
| H | 0.20906400  | -1.07978700 | 5.24117000  |

#### Reference:

1. M. J. T. Frisch, G. W.; H. B. Schlegel, G. E. Scuseria, M. A. Robb, J. R. Cheeseman, G. Scalmani, V. Barone, B. Mennucci, G. A. Petersson, H. Nakatsuji, M. Caricato, X. Li, H. P. Hratchian, A. F. Izmaylov, J. Bloino, G. Zheng, J. L. Sonnenberg, M. Hada, M. Ehara, K. Toyota, R. Fukuda, J. Hasegawa, M. Ishida, T. Nakajima, Y. Honda, O. Kitao, H. Nakai, T. Vreven, J. A. Montgomery Jr., J. E. Peralta, F. Ogliaro, M. Bearpark, J. J. Heyd, E. Brothers, K. N. Kudin, V. N. Staroverov, R. Kobayashi, J. Normand, K. Raghavachari, A. Rendell, J. C. Burant, S. S. Iyengar, J. Tomasi, M. Cossi, N. Rega, N. J. Millam, M. Klene, J. E. Knox, J. B. Cross, V. Bakken, C. Adamo, J. Jaramillo, R. Gomperts, R. E. Stratmann, O. Yazyev, A. J. Austin, R. Cammi, C. Pomelli, J. W. Ochterski, R. L. Martin, K. Morokuma, V. G. Zakrzewski, G. A. Voth, P. Salvador, J. J. Dannenberg, S. Dapprich, A. D. Daniels, O. Farkas, J. B. Foresman, J. V. Ortiz, J. Cioslowski and D. J. Fox, Gaussian 09, Revision C.01; *Gaussian, Inc.: Wallingford CT*, **2010**.
2. (a) A. D. Becke, *J. Chem. Phys.*, 1993, **98**, 5648; (b) C. T. Lee, W. T. Yang and R. G. Parr, *Phys Rev B*, 1988, **37**, 785.
3. P. J. Hay and W. R. Wadt, *J. Chem. Phys.*, 1985, **82**, 270.

**4-(2,4-Dimethoxyphenyl)-pyridine (4a):**

<sup>1</sup>H NMR (400 MHz, CDCl<sub>3</sub>, ppm): δ 8.61 (s, 2H), 7.61 (d, *J* = 4.8 Hz, 2H), 7.34 (*J* = 8.4 Hz, 1H), 6.64 (*J* = 2.0 Hz, 1H), 6.60 (s, 1H), 3.87 (d, *J* = 11.2 Hz, 6H). <sup>13</sup>C NMR (400 MHz, CDCl<sub>3</sub>, ppm): δ 162.1, 158.0, 148.4, 147.1, 131.3, 124.5, 119.5, 105.4, 99.1, 55.6. MS (*m/z*) calcd. for C<sub>13</sub>H<sub>13</sub>NO<sub>2</sub>: 215.25, found 215.26.

**2-(2,4-dimethoxyphenyl)pyridine (4b):**

<sup>1</sup>H NMR (400 MHz, CDCl<sub>3</sub>, ppm): δ 8.57 (d, *J* = 4.6 Hz, 1H), 7.88 (t, *J* = 9.7 Hz, 2H), 7.70 (td, *J* = 2.0, 7.4 Hz, 1H), 7.18 (ddd, *J* = 1.4, 4.8, 7.4 Hz, 1H), 6.65 (m, 2H), 3.88 (s, 3H), 3.85 (s, 3H). <sup>13</sup>C NMR (400 MHz, CDCl<sub>3</sub>, ppm): δ 163.1, 156.0, 148.7, 147.5, 131.3, 128.5, 119.5, 115.4, 99.1, 55.6. MS (*m/z*) calcd. for C<sub>13</sub>H<sub>13</sub>NO<sub>2</sub>: 215.25, found 215.26.

**4-(4-Methoxyphenyl)-pyridine (6a):**

<sup>1</sup>H NMR (400 MHz, CDCl<sub>3</sub>, ppm): δ 8.60 (d, *J* = 6.0 Hz, 2H), 7.59 (d, *J* = 8.8 Hz, 2H), 7.46 (d, *J* = 6.0 Hz, 2H), 7.00 (d, *J* = 8.8 Hz, 2H), 3.86 (s, 3H). <sup>13</sup>C NMR (400 MHz, CDCl<sub>3</sub>, ppm): δ 160.8, 150.2, 148.1, 130.5, 128.4, 121.3, 114.8, 55.6. MS (*m/z*) calcd. for C<sub>12</sub>H<sub>11</sub>ON: 185.08, found: 185.08.

**4-(3-Methoxyphenyl)-pyridine (6b):**

<sup>1</sup>H NMR (400 MHz, CDCl<sub>3</sub>, ppm): δ 8.66 (d, *J* = 6.0 Hz, 2H), 7.50 (d, *J* = 6.0 Hz, 2H), 7.40 (t, *J* = 8.0 Hz, 1H), 7.22 (d, *J* = 7.6 Hz, 1H), 7.15 (s, 1H), 6.99 (d, *J* = 8.0 Hz, 1H), 3.85 (s, 3H). <sup>13</sup>C NMR (400 MHz, CDCl<sub>3</sub>, ppm): δ 160.2, 150.0, 148.5, 139.5, 130.2, 121.8, 119.4, 114.4, 112.8, 55.4. MS (*m/z*) calcd. for C<sub>12</sub>H<sub>11</sub>ON: 185.08, found: 185.08.

**4-(2-Methoxyphenyl)-pyridine (6c):**

<sup>1</sup>H NMR (400 MHz, CDCl<sub>3</sub>, ppm): δ 8.62 (d, *J* = 6.0 Hz, 2H), 7.47 (d, *J* = 4.4 Hz, 2H), 7.38 (t, *J* = 8.0 Hz, 1H), 7.33 (d, *J* = 7.6 Hz, 1H), 7.05 (t, *J* = 7.6 Hz, 1H), 6.99 (d, *J* = 8.4 Hz, 1H), 3.82 (s, 3H). <sup>13</sup>C NMR (400 MHz, CDCl<sub>3</sub>, ppm): δ 156.6, 149.3, 146.6, 130.5, 130.2, 127.6, 124.4, 121.1, 111.5, 55.6. MS (*m/z*) calcd. for C<sub>12</sub>H<sub>11</sub>ON: 185.08, found: 185.08.

**4-(2-Methylphenyl)-pyridine (6d):**

<sup>1</sup>H NMR (400 MHz, CDCl<sub>3</sub>, ppm): δ 8.64 (d, *J* = 4.8 Hz, 2H), 7.27 (m, 5H), 7.19 (d, *J* = 7.2 Hz, 1H), 2.27 (s, 3H). <sup>13</sup>C NMR (400 MHz, CDCl<sub>3</sub>, ppm): δ 149.9, 149.5, 139.0, 135.0, 130.7, 129.3, 128.4, 126.1, 124.3, 20.3. MS (*m/z*) calcd. for C<sub>12</sub>H<sub>10</sub>N: 168.08, found: 168.08.

**4-(3-Methylphenyl)-pyridine (6e):**

<sup>1</sup>H NMR (400 MHz, CDCl<sub>3</sub>, ppm): δ 8.61 (d, *J* = 6.0 Hz, 2H), 7.43 (m, 2H), 7.39 (s, 1H), 7.37 (s, 1H), 7.32 (t, *J* = 7.2 Hz, 1H), 7.22 (d, *J* = 7.6 Hz, 1H), 2.41 (s, 3H). <sup>13</sup>C NMR (400 MHz, CDCl<sub>3</sub>, ppm): δ 150.0, 138.7, 137.9, 129.7, 128.9, 127.6, 124.0, 121.5, 21.4. MS (*m/z*) calcd. for C<sub>12</sub>H<sub>11</sub>N: 169.09, found: 169.09.

**4-(4-Methylphenyl)-pyridine (6f):**

<sup>1</sup>H NMR (400 MHz, CDCl<sub>3</sub>, ppm): δ 8.64 (d, *J* = 6.0 Hz, 2H), 7.54 (d, *J* = 8.0 Hz, 2H), 7.50 (d, *J* = 6.0 Hz, 2H), 7.29 (d, *J* = 7.6 Hz, 2H), 2.41 (s, 3H). <sup>13</sup>C NMR (400 MHz, CDCl<sub>3</sub>, ppm): δ 150.2, 148.7, 139.6, 135.3, 130.1, 127.1, 121.7, 21.5. MS (*m/z*) calcd. for C<sub>12</sub>H<sub>11</sub>N: 169.09, found: 169.09.

**4-(2,4,6-Trimethylphenyl)-pyridine (6g):**

<sup>1</sup>H NMR (400 MHz, CDCl<sub>3</sub>, ppm): δ 8.68 (d, *J* = 5.6 Hz, 2H), 7.16 (t, *J* = 4.4 Hz, 2H), 6.96 (s, 2H), 2.34 (s, 3H), 1.99 (s, 6H). <sup>13</sup>C NMR (400 MHz, CDCl<sub>3</sub>, ppm): δ 150.6, 149.0, 137.8, 135.0, 128.4, 125.1, 21.1, 20.6, 14.2. MS (*m/z*) calcd. for C<sub>14</sub>H<sub>15</sub>N: 197.21, found: 197.20.

**4-(3,5-Dimethylphenyl)-pyridine (6h):**

<sup>1</sup>H NMR (400 MHz, CDCl<sub>3</sub>, ppm): δ 8.65 (d, *J* = 6.0 Hz, 2H), 7.50 (d, *J* = 6.0 Hz, 2H), 7.26 (s, 2H), 7.10 (s, 1H), 2.41 (s, 6H). <sup>13</sup>C NMR (400 MHz, CDCl<sub>3</sub>, ppm): δ 150.0, 148.8, 138.8, 138.1, 130.8, 124.9, 121.8, 21.4. MS (*m/z*) calcd. for C<sub>13</sub>H<sub>13</sub>N: 183.24, found: 183.24.

**4-(4-Fluoro-phenyl)-pyridine (6i):**

<sup>1</sup>H NMR (400 MHz, CDCl<sub>3</sub>, ppm): δ 8.66 (d, *J* = 6.0 Hz, 2H), 7.64 (dd, *J* = 5.6 Hz, 3.2 Hz, 2H), 7.43 (d, *J* = 6.0 Hz, 2H), 7.18 (t, *J* = 8.8 Hz, 2H). <sup>13</sup>C NMR (400 MHz, CDCl<sub>3</sub>, ppm): δ 164.7, 162.3, 150.1, 147.5, 134.2, 128.9, 128.8, 121.5, 116.3, 116.1. MS (*m/z*) calcd. for C<sub>11</sub>H<sub>8</sub>NF: 173.06, found: 173.06.

**4-(Pyridin-4-yl)-benzotrile (6j):**

<sup>1</sup>H NMR (400 MHz, CDCl<sub>3</sub>, ppm): δ 8.72 (d, *J* = 5.6 Hz, 2H), 7.78 (d, *J* = 8.4 Hz, 2H), 7.73 (d, *J* = 8.4 Hz, H), 7.50 (d, *J* = 6.0 Hz, 2H). <sup>13</sup>C NMR (400 MHz, CDCl<sub>3</sub>, ppm): δ 150.5, 146.5, 142.6, 132.9, 127.8, 121.7, 118.4, 112.9. MS (*m/z*) calcd. for C<sub>12</sub>H<sub>8</sub>N<sub>2</sub>: 180.07, found: 180.07.

**4-(4-Trifluoromethylphenyl)-pyridine (6k):**

<sup>1</sup>H NMR (400 MHz, CDCl<sub>3</sub>, ppm): δ 8.69 (d, *J* = 6.4 Hz, 2H), 7.72 (s, 4H), 7.49 (d, *J* = 6.0 Hz, 2H). <sup>13</sup>C NMR (400 MHz, CDCl<sub>3</sub>, ppm): δ 150.5, 147.0, 141.8, 131.3, 130.0, 127.5, 126.2, 126.1, 122.7, 121.8. MS (*m/z*) calcd. for C<sub>12</sub>H<sub>8</sub>NF<sub>3</sub>: 223.06, found: 223.05.

**4-Biphenyl-4-yl-pyridine (6l):**

<sup>1</sup>H NMR (400 MHz, CDCl<sub>3</sub>, ppm): δ 8.69 (d, *J* = 6.0 Hz, 2H), 7.73 (s, 4H), 7.64 (d, *J* = 7.2 Hz, 2H), 7.60 (d, *J* = 6.0 Hz, 2H), 7.48 (t, *J* = 7.2 Hz, 2H), 7.39 (t, *J* = 7.2 Hz, 1H). <sup>13</sup>C NMR (400 MHz, CDCl<sub>3</sub>, ppm): δ = 149.4, 148.7, 142.3, 140.1, 136.5, 129.0, 127.9, 127.9, 127.5, 127.1, 121.7. MS (*m/z*) Calcd. for C<sub>17</sub>H<sub>13</sub>N<sub>1</sub>: 231.11, found: 231.11.

**4-(Naphthalen-1-yl)-pyridine (6m):**

$^1\text{H}$  NMR (400 MHz,  $\text{CDCl}_3$ , ppm):  $\delta$  8.73 (d,  $J = 5.2$  Hz, 2H), 7.92 (m, 2H), 7.84 (d,  $J = 8.4$  Hz, 1H), 7.48 (m, 6H).  $^{13}\text{C}$  NMR (400 MHz,  $\text{CDCl}_3$ , ppm):  $\delta$  149.7, 148.8, 137.3, 133.8, 130.7, 128.9, 128.6, 126.9, 126.7, 126.2, 125.4, 125.2, 125.1. MS ( $m/z$ ) calcd. for  $\text{C}_{15}\text{H}_{11}\text{N}$ : 205.09, found: 205.08.

**4-(Naphthalen-2-yl)-pyridine (6n):**

$^1\text{H}$  NMR (400 MHz,  $\text{CDCl}_3$ , ppm):  $\delta$  8.75 (d,  $J = 6.4$  Hz), 8.10 (m, 1H), 7.63 (m, 2H), 7.56 (d,  $J = 6.4$  Hz, 2H), 7.46 (m, 5H).  $^{13}\text{C}$  NMR (400 MHz,  $\text{CDCl}_3$ , ppm):  $\delta$  149.7, 148.8, 137.3, 133.8, 130.7, 128.9, 128.6, 126.9, 126.7, 126.2, 125.4, 125.2, 125.1. MS ( $m/z$ ) calcd. for  $\text{C}_{15}\text{H}_{11}\text{N}$ : 205.09, found: 205.09.

**Figure S5.**  $^1\text{H}$  NMR,  $^{13}\text{C}$  NMR spectra of 4-(2,4-dimethoxyphenyl)-pyridine (**4a**).

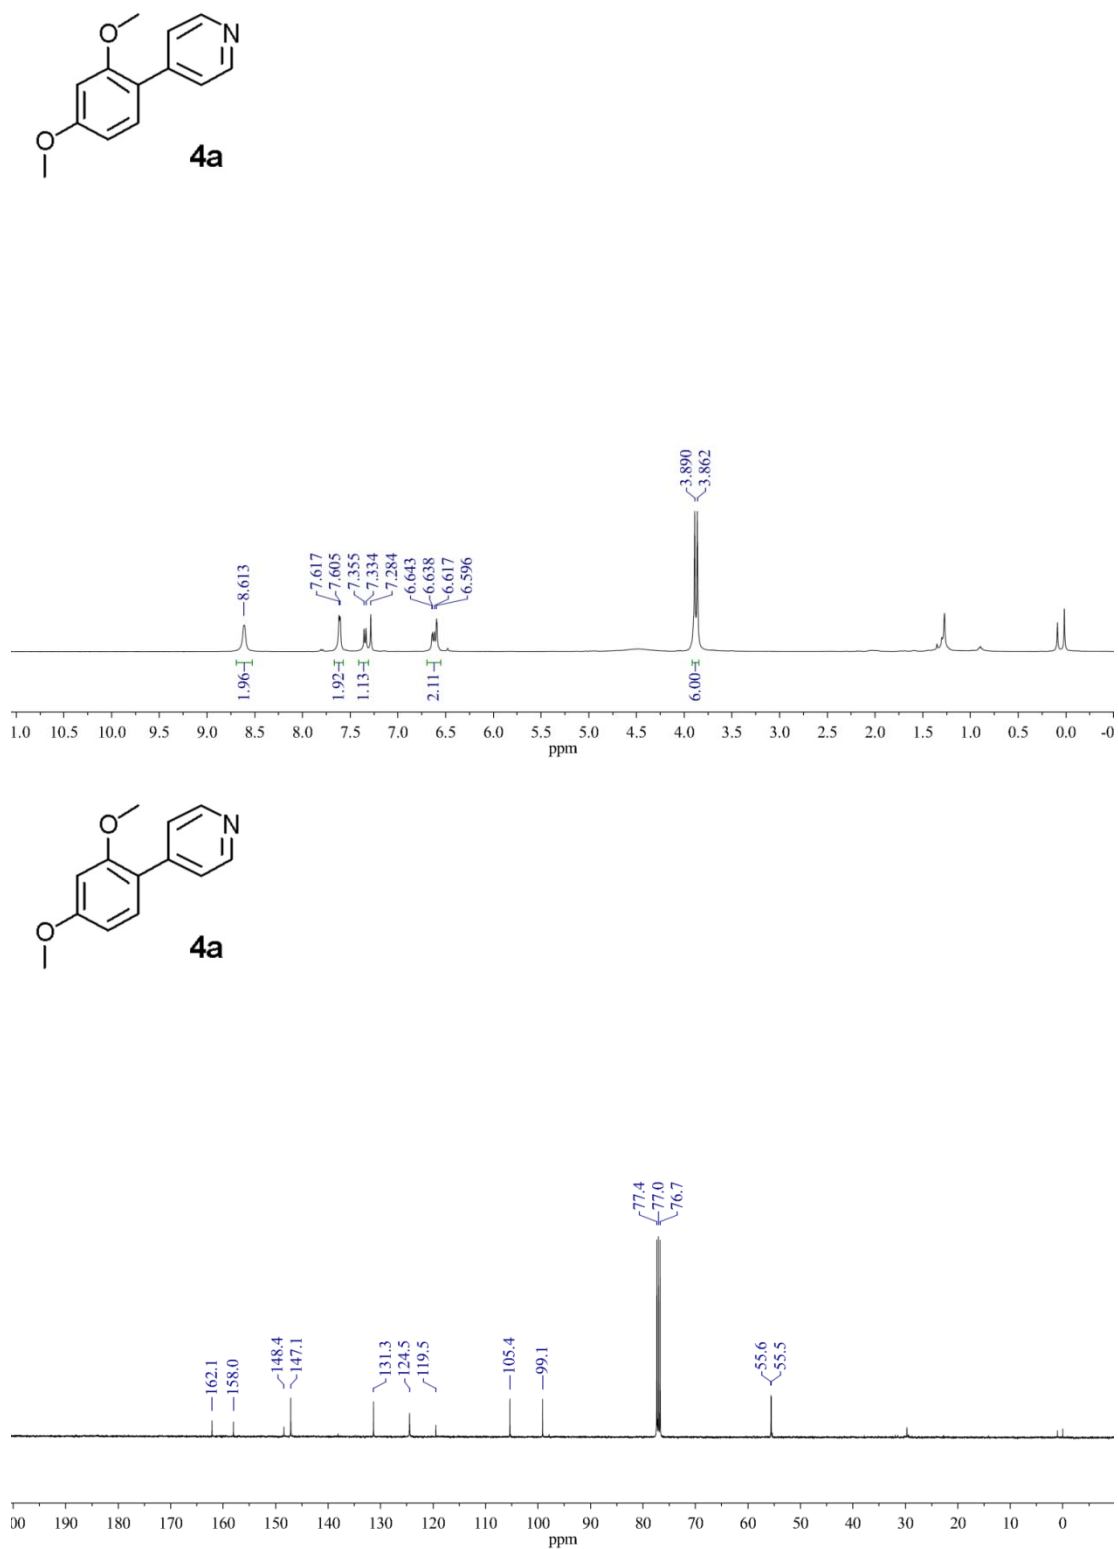

**Figure S6.**  $^1\text{H}$  NMR,  $^{13}\text{C}$  NMR spectra of 4-(4-methoxyphenyl)-pyridine (**6a**)

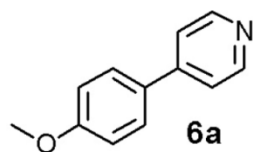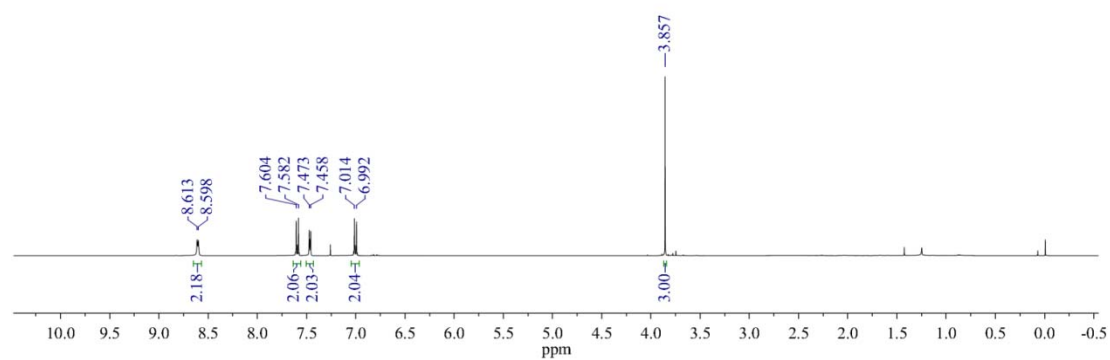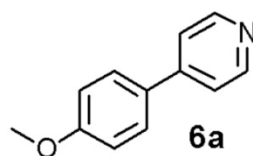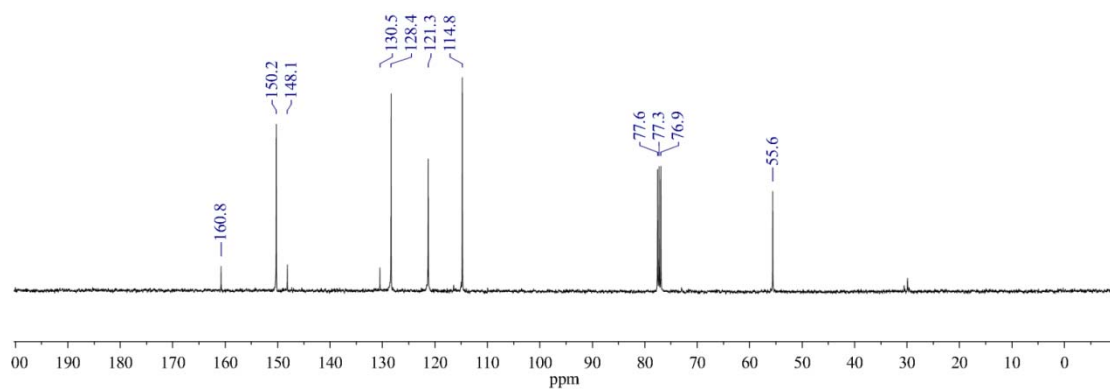

**Figure S7.**  $^1\text{H}$  NMR,  $^{13}\text{C}$  NMR spectra of 4-(3-methoxyphenyl)-pyridine (**6b**)

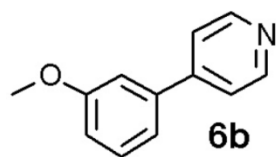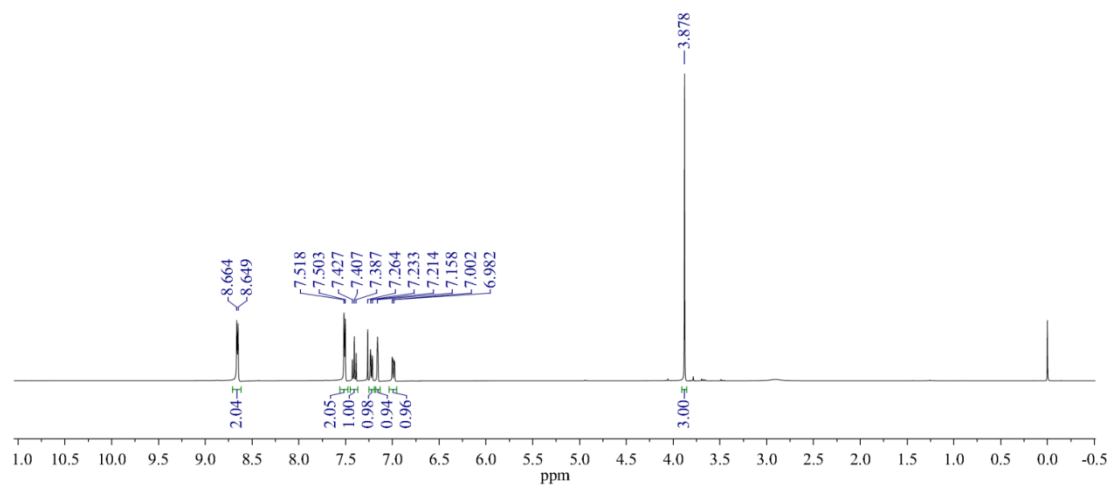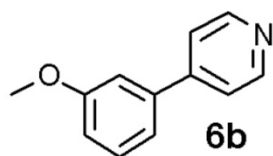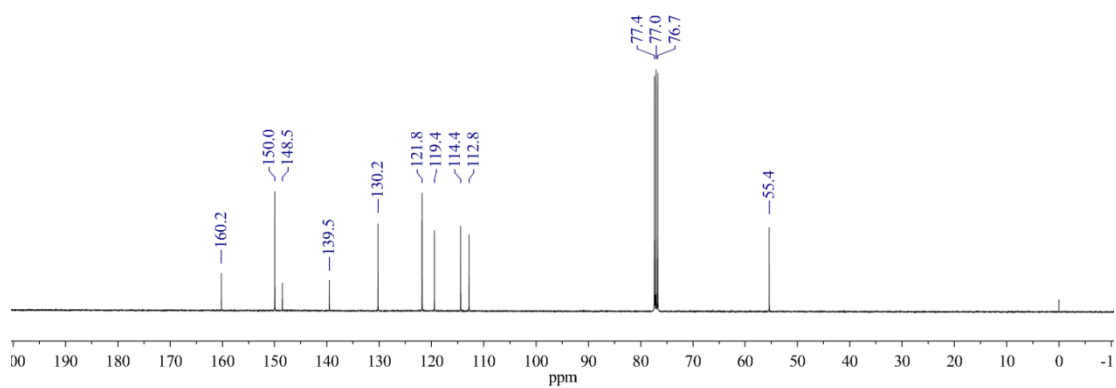



**Figure S8.**  $^1\text{H}$  NMR,  $^{13}\text{C}$  NMR spectra of 4-(2-methoxyphenyl)-pyridine (**6c**)

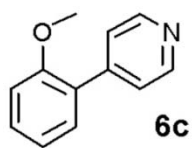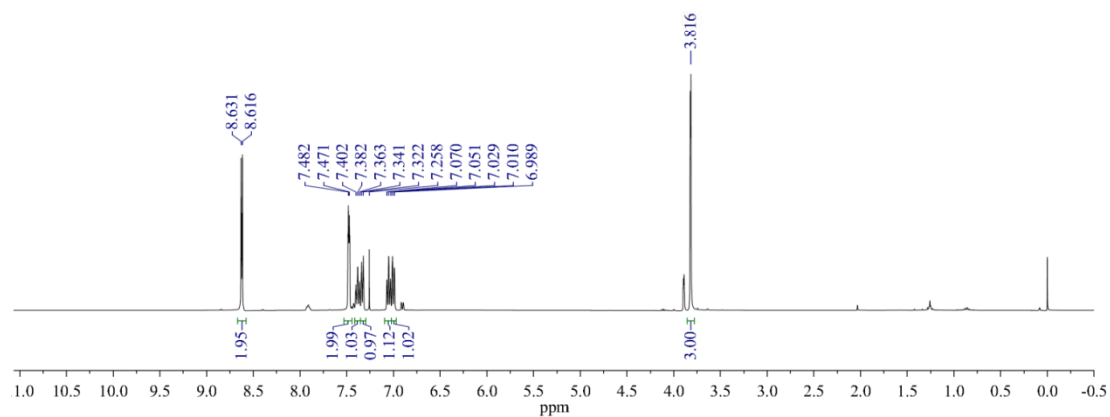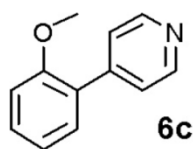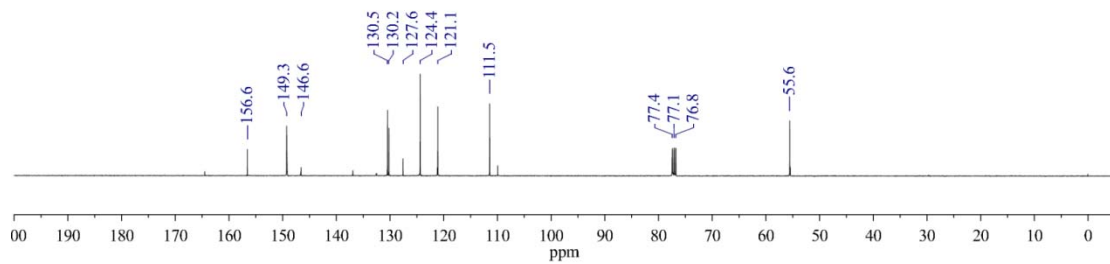

**Figure S9.**  $^1\text{H}$  NMR,  $^{13}\text{C}$  NMR spectra of 4-(2-methylphenyl)-pyridine (**6d**)

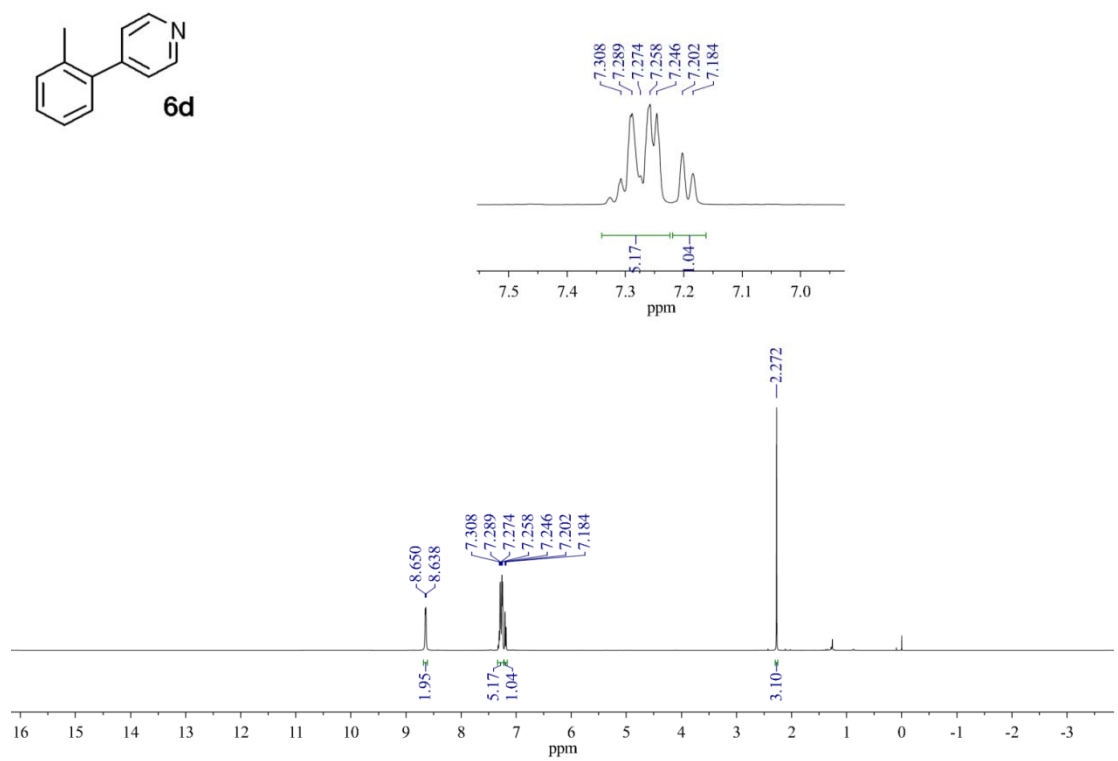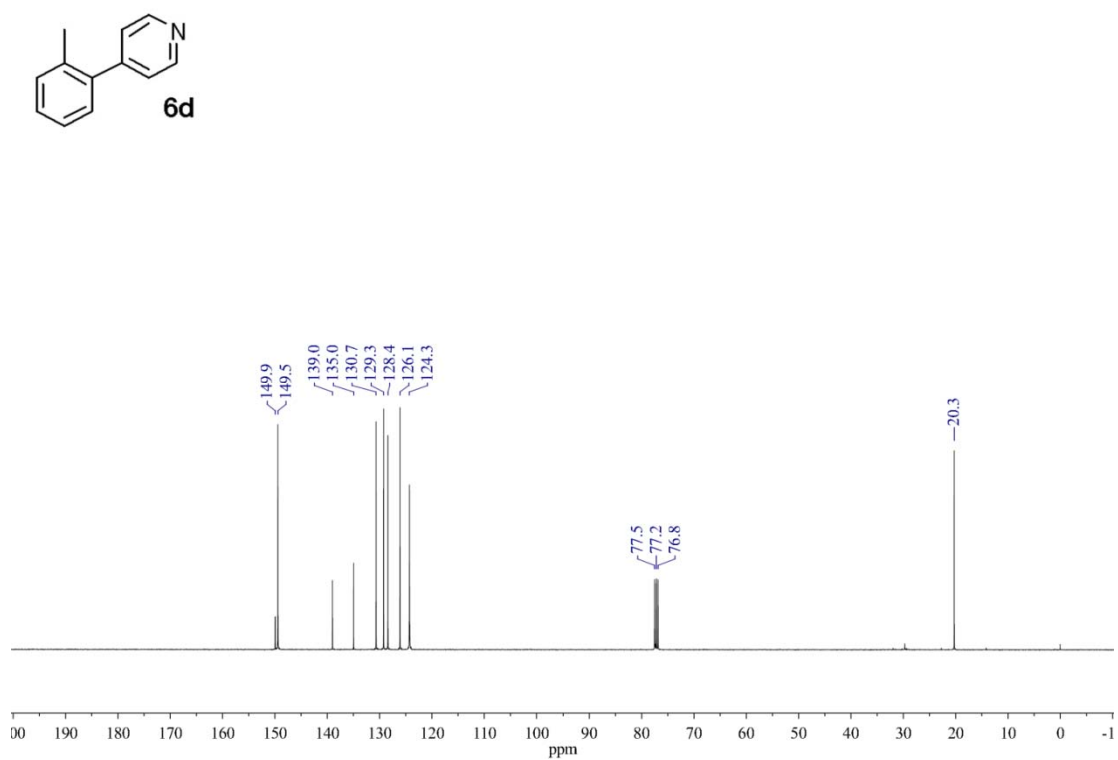

**Figure S10.**  $^1\text{H}$  NMR,  $^{13}\text{C}$  NMR spectra of 4-(3-methylphenyl)-pyridine (**6e**)

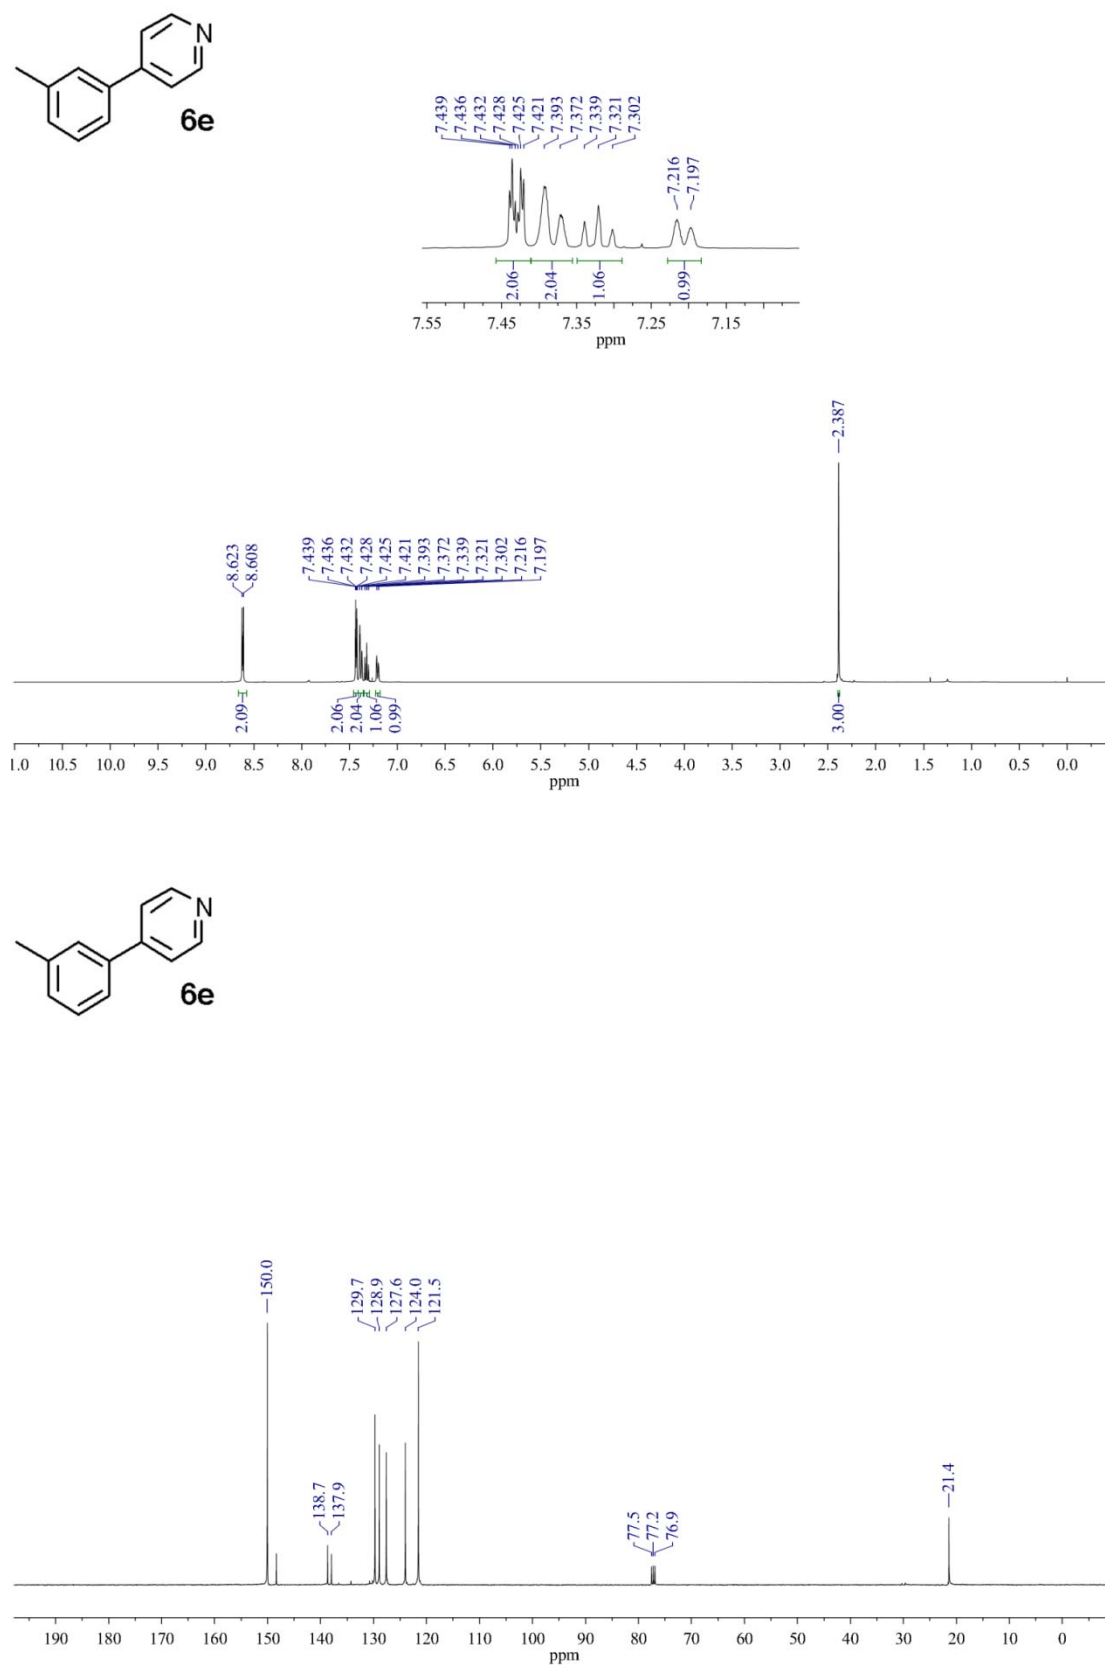

**Figure S11.**  $^1\text{H}$  NMR,  $^{13}\text{C}$  NMR spectra of 4-(4-methylphenyl)-pyridine (**6f**)

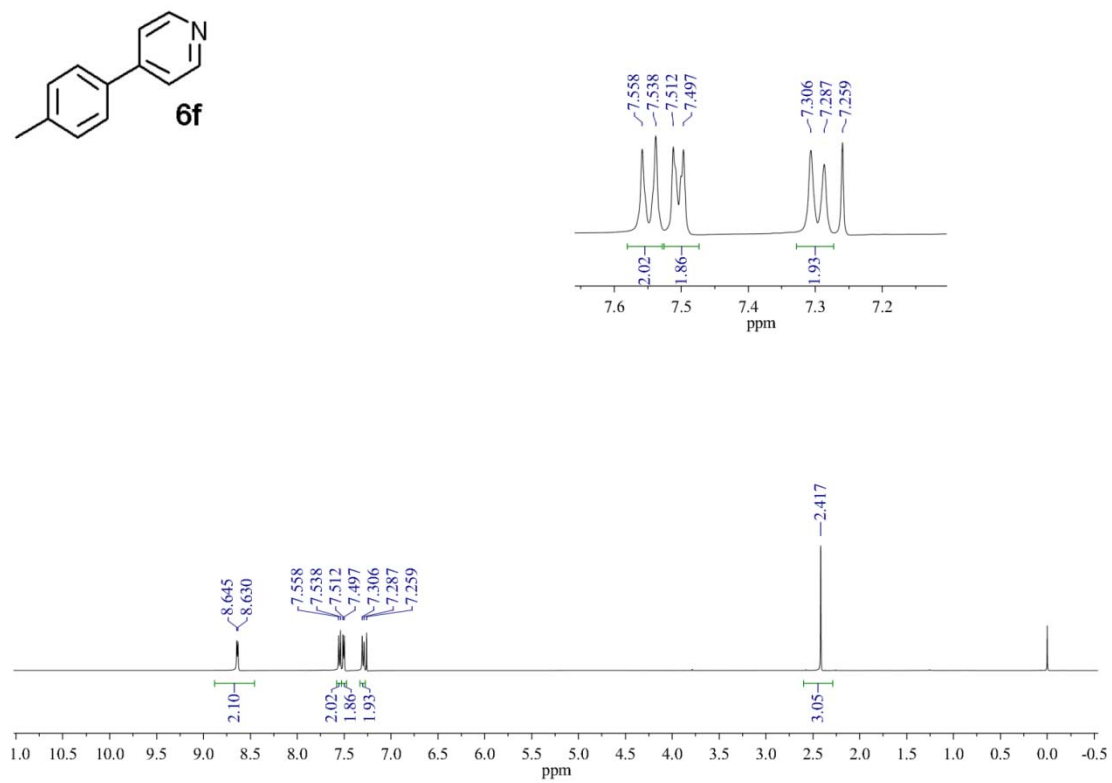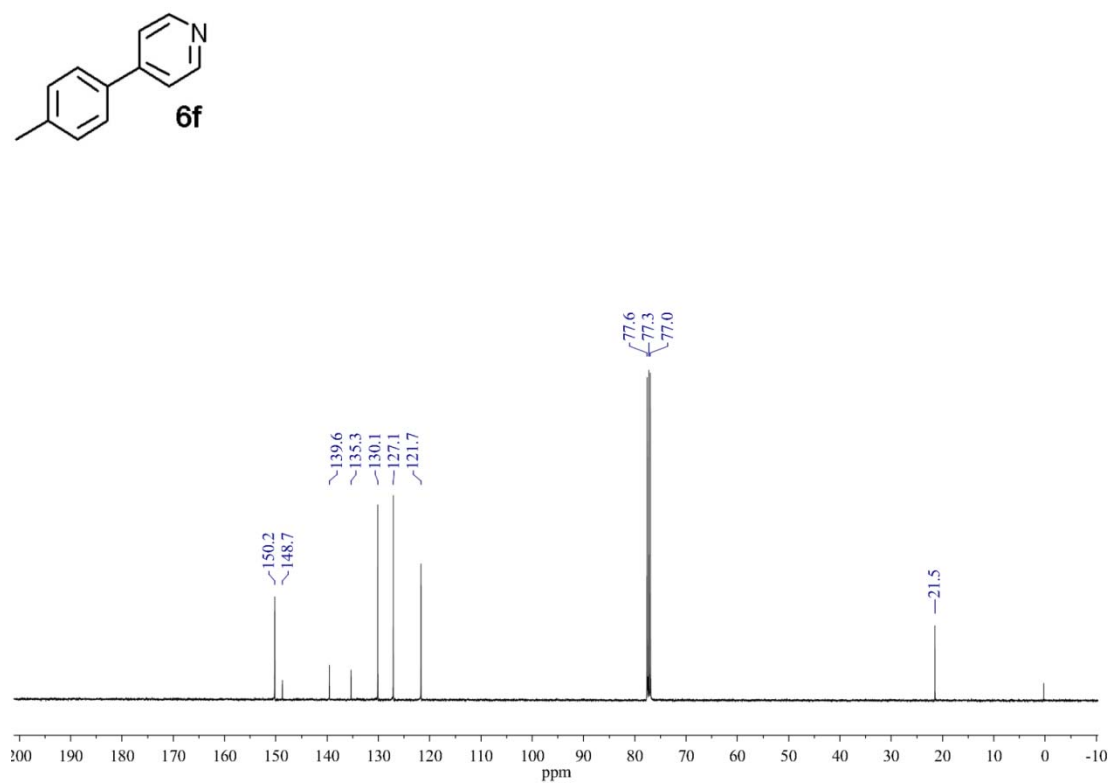

**Figure S12.**  $^1\text{H}$  NMR,  $^{13}\text{C}$  NMR spectra of 4-(2,4,6-trimethyl-phenyl)-pyridine (**6g**)

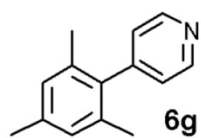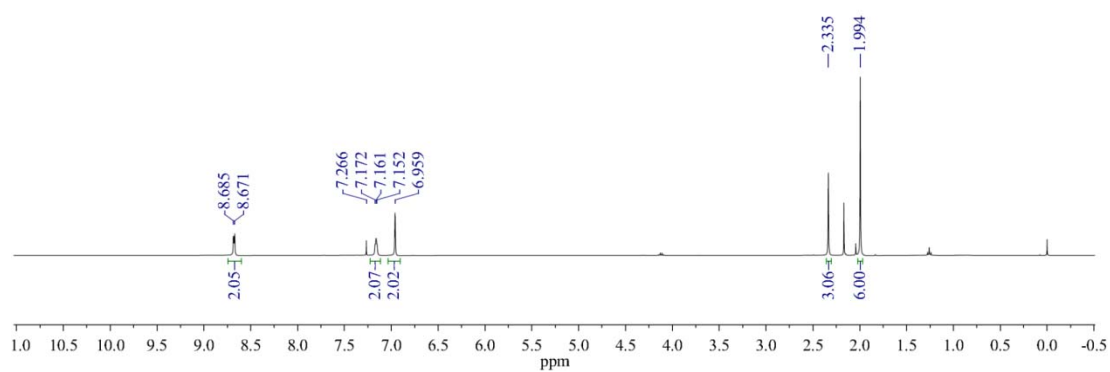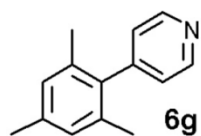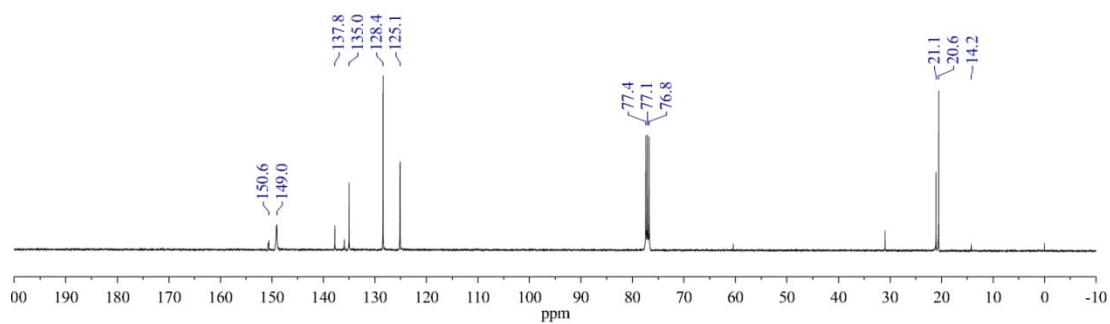

**Figure S13.**  $^1\text{H}$  NMR,  $^{13}\text{C}$  NMR spectra of 4-(3,5-dimethyl-phenyl)-pyridine (**6h**)

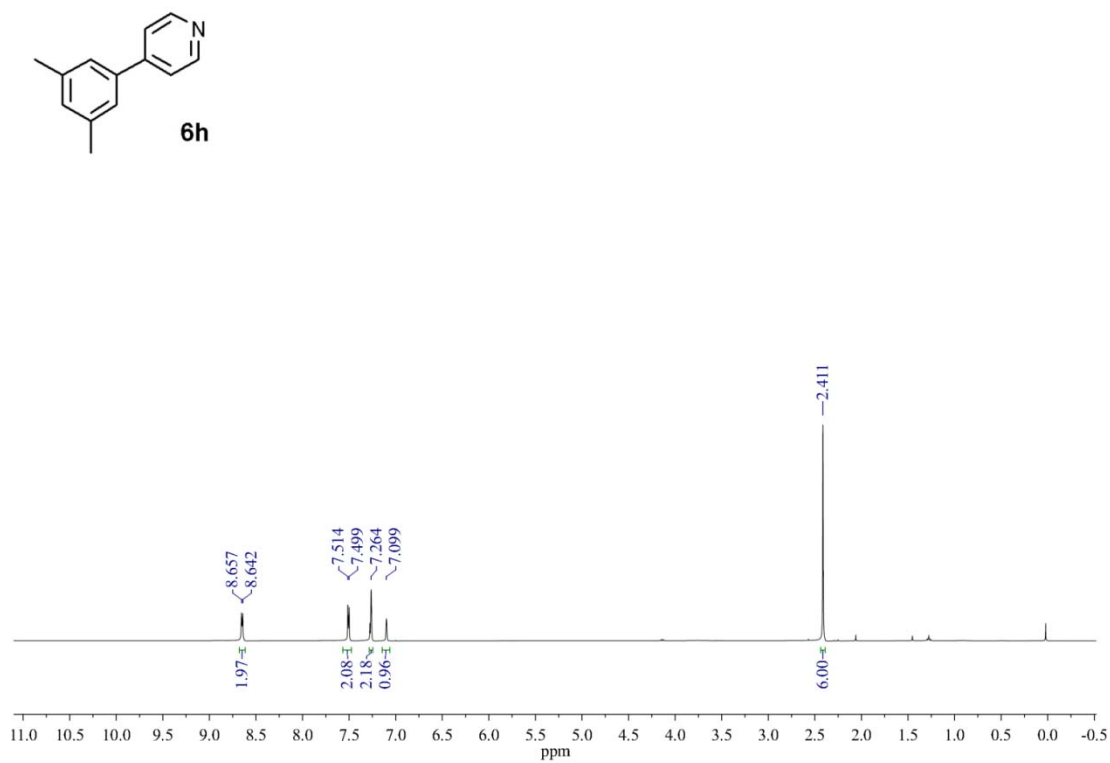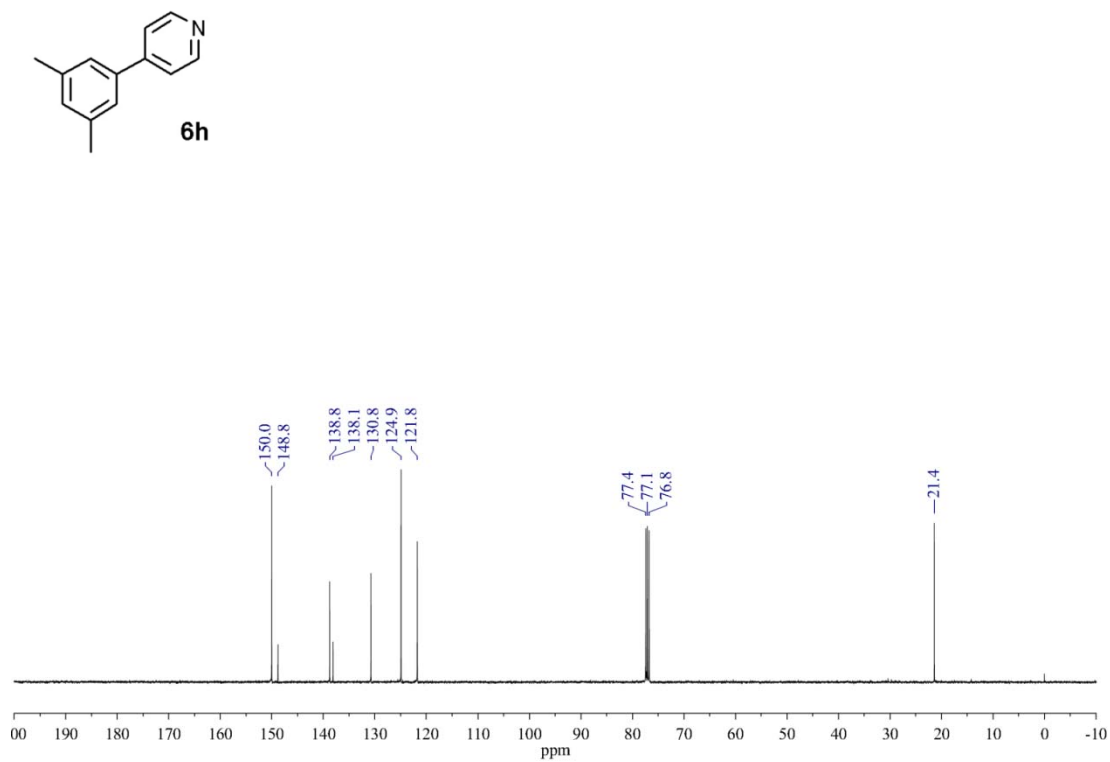

**Figure S14.**  $^1\text{H}$  NMR,  $^{13}\text{C}$  NMR spectra of 4-(4-fluoro-phenyl)-pyridine (**6i**)

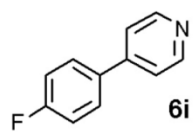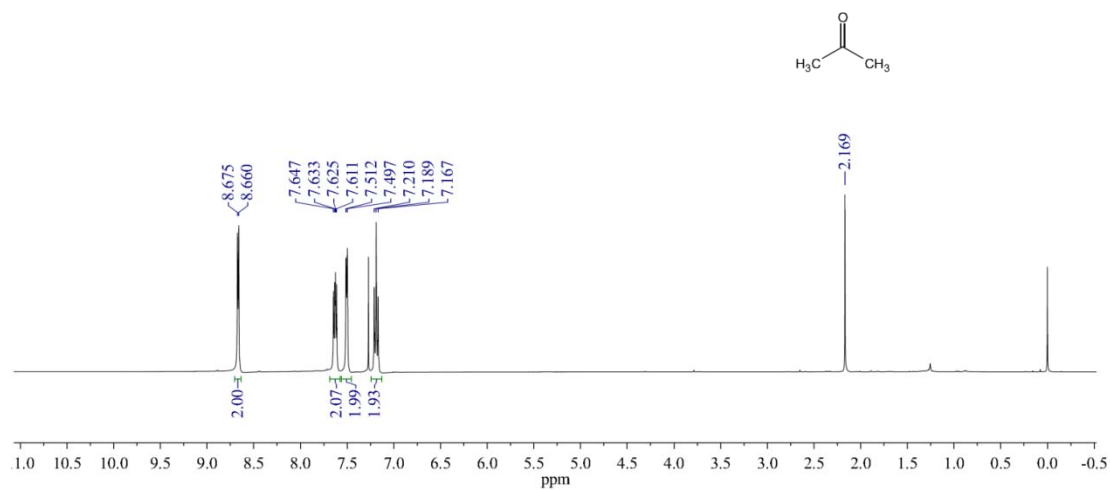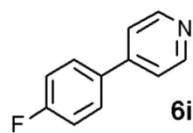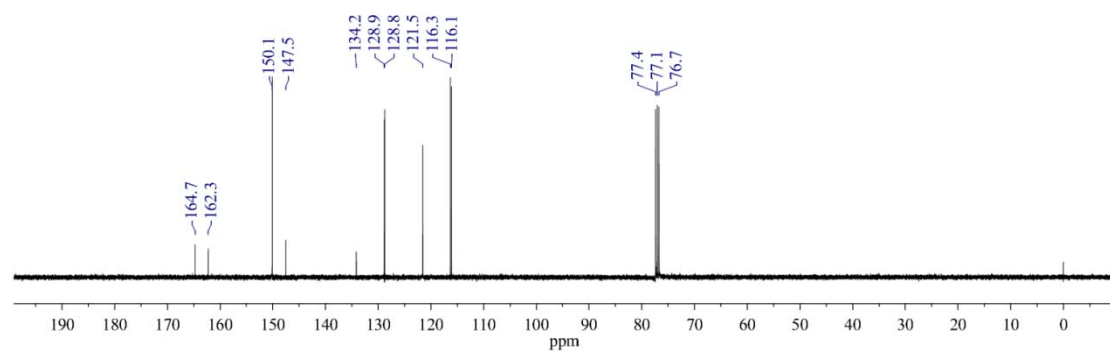

**Figure S15.**  $^1\text{H}$  NMR,  $^{13}\text{C}$  NMR spectra of 4-(pyridin-4-yl)-benzonitrile (**6j**)

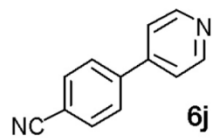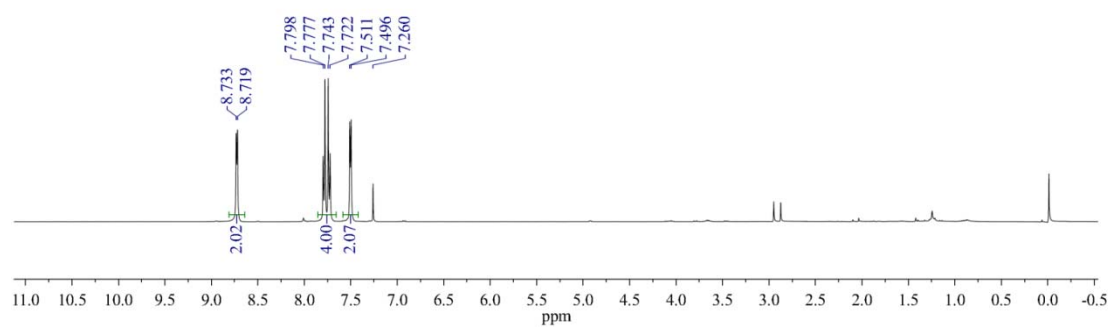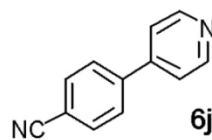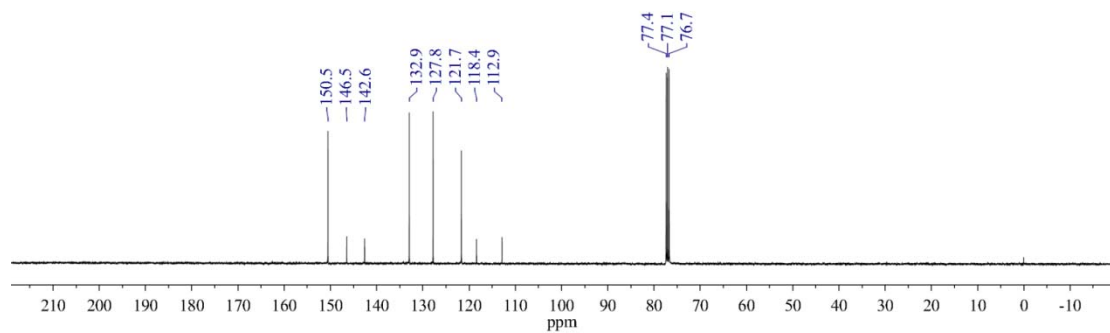



**Figure S16.**  $^1\text{H}$  NMR,  $^{13}\text{C}$  NMR spectra of 4-(4-trifluoromethylphenyl)-pyridine (**6k**)

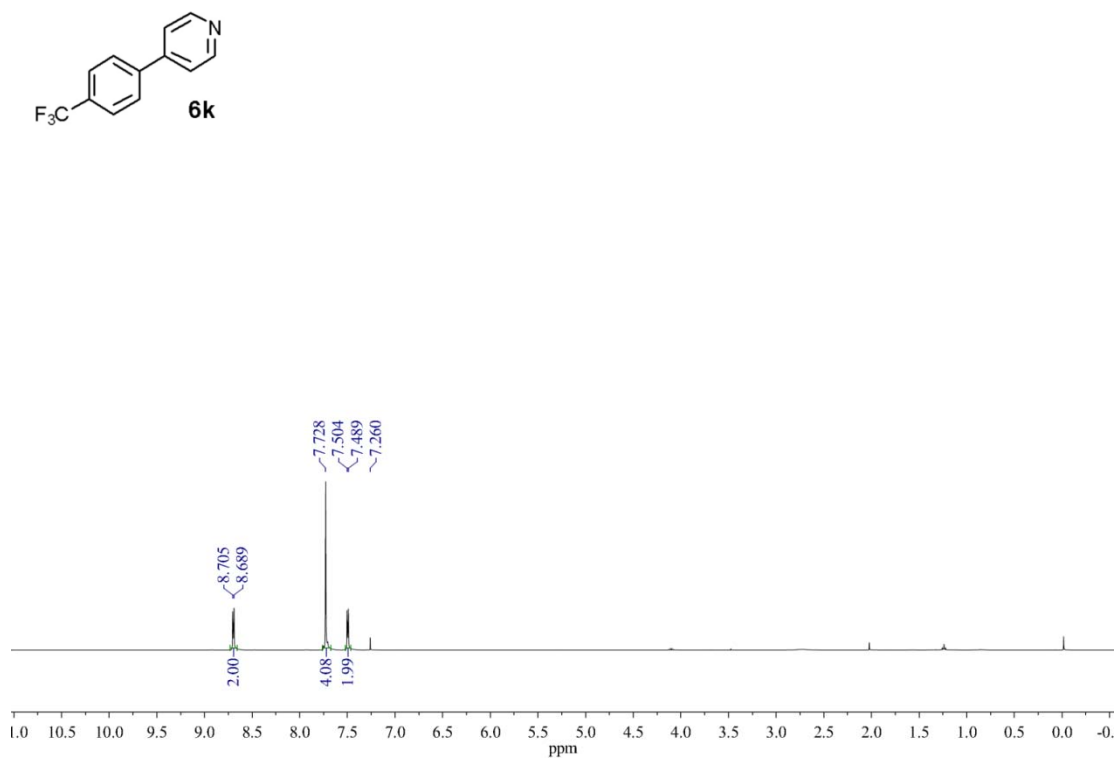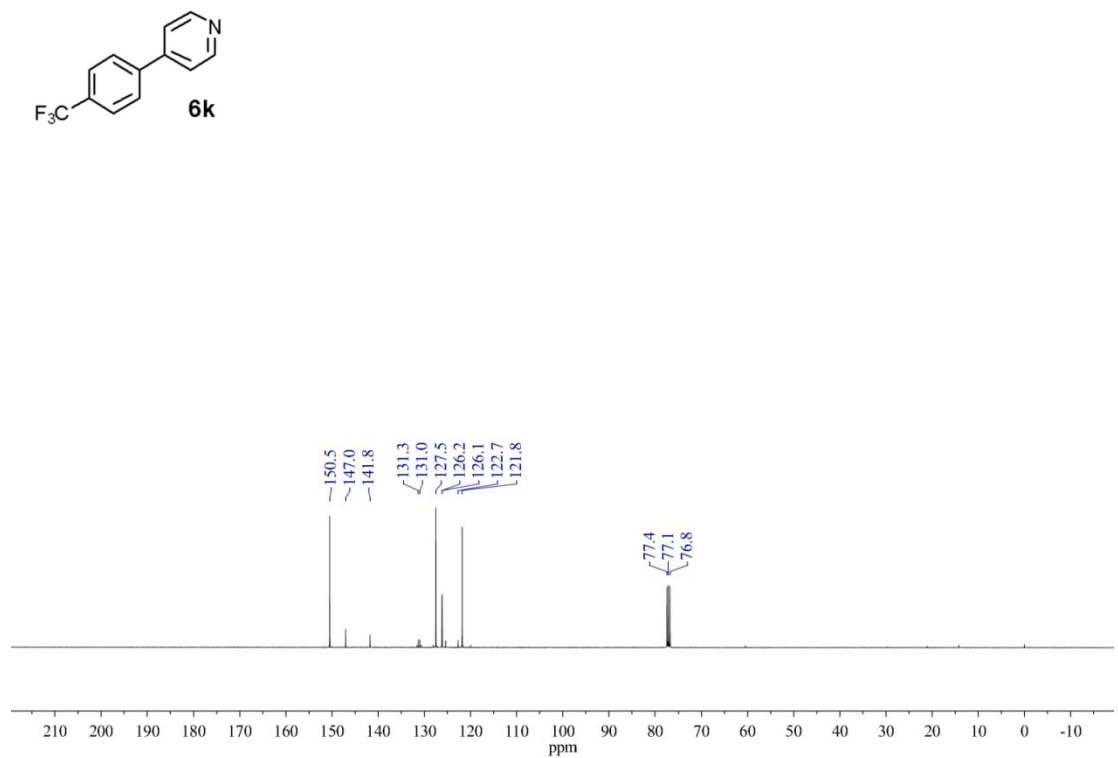

**Figure S17.**  $^1\text{H}$  NMR,  $^{13}\text{C}$  NMR spectra of 4-biphenyl-4-yl-pyridine (**6l**)

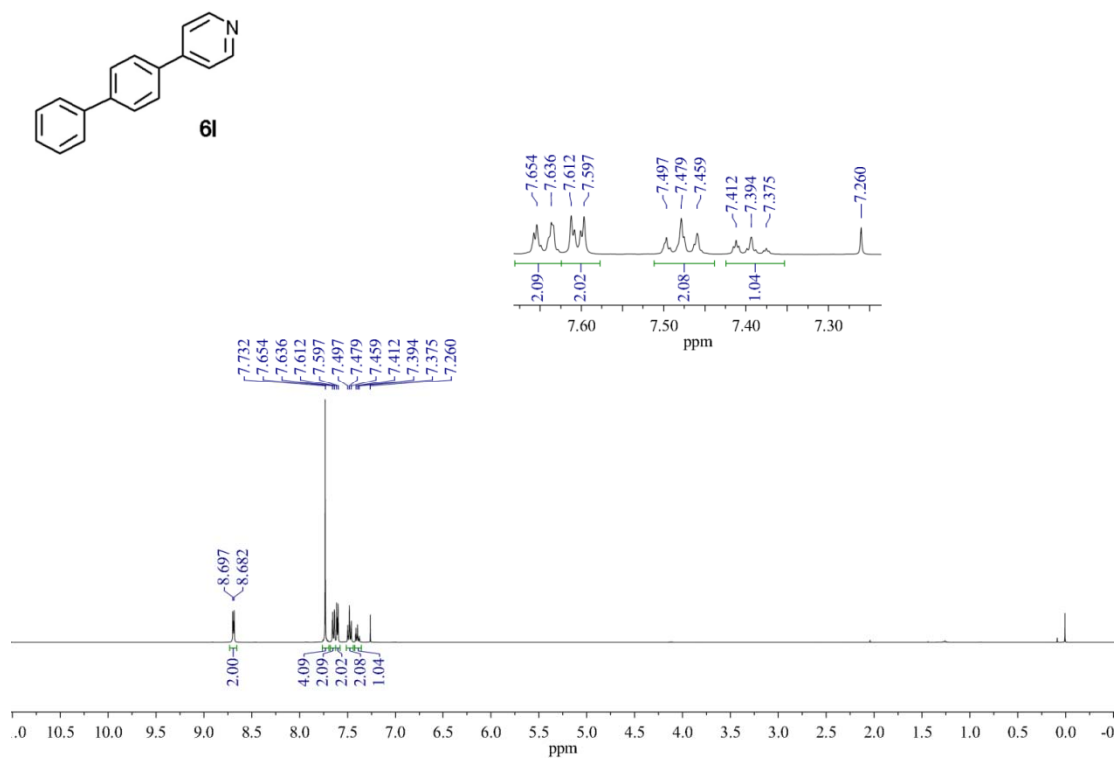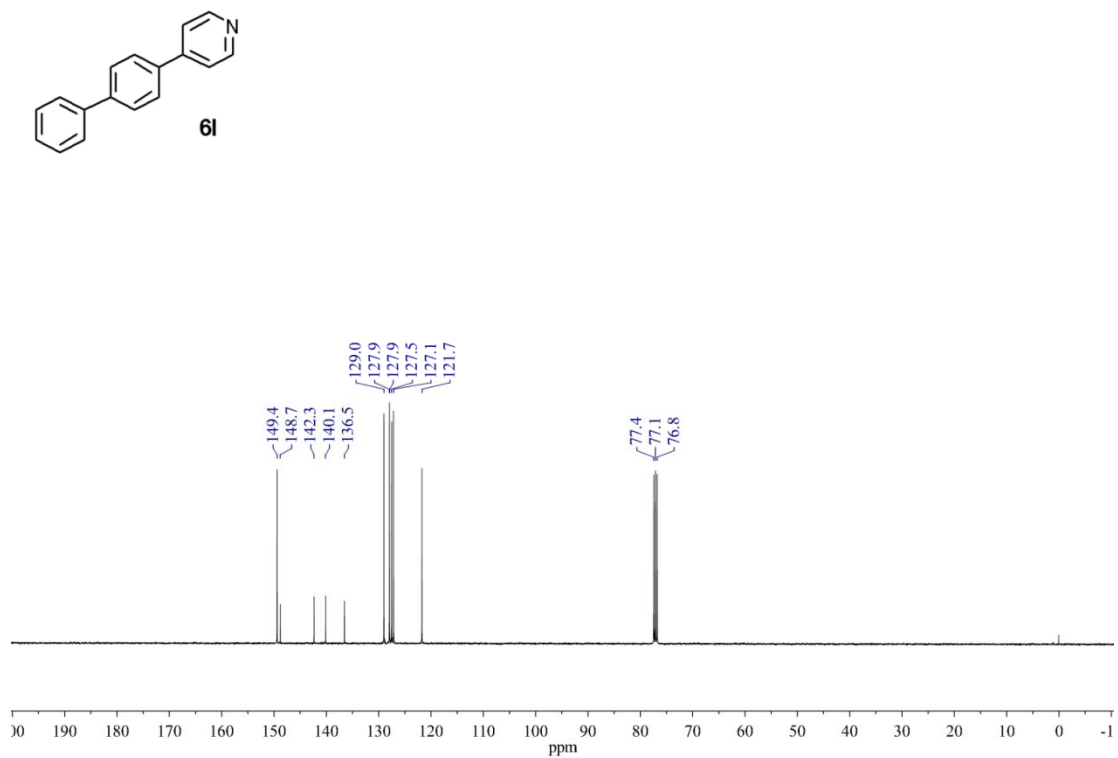

**Figure S18.**  $^1\text{H}$  NMR,  $^{13}\text{C}$  NMR spectra of 4-(naphthalen-1-yl)pyridine (**6m**)

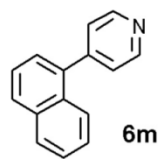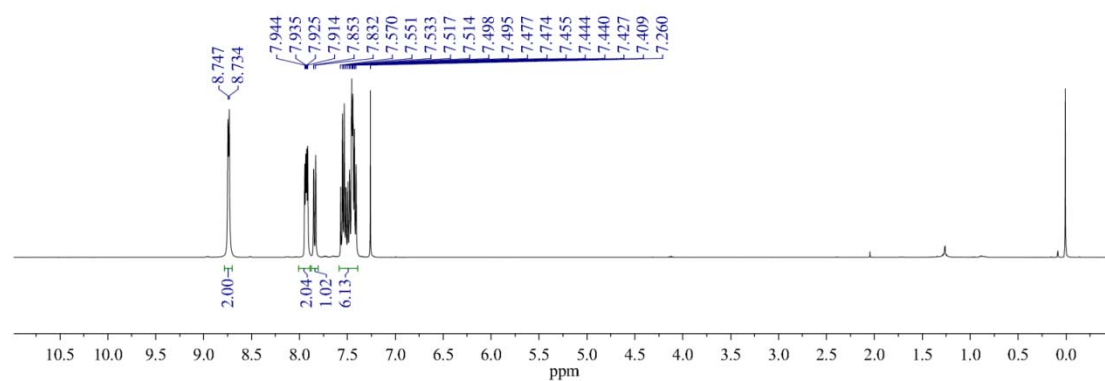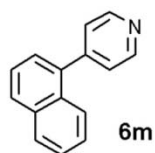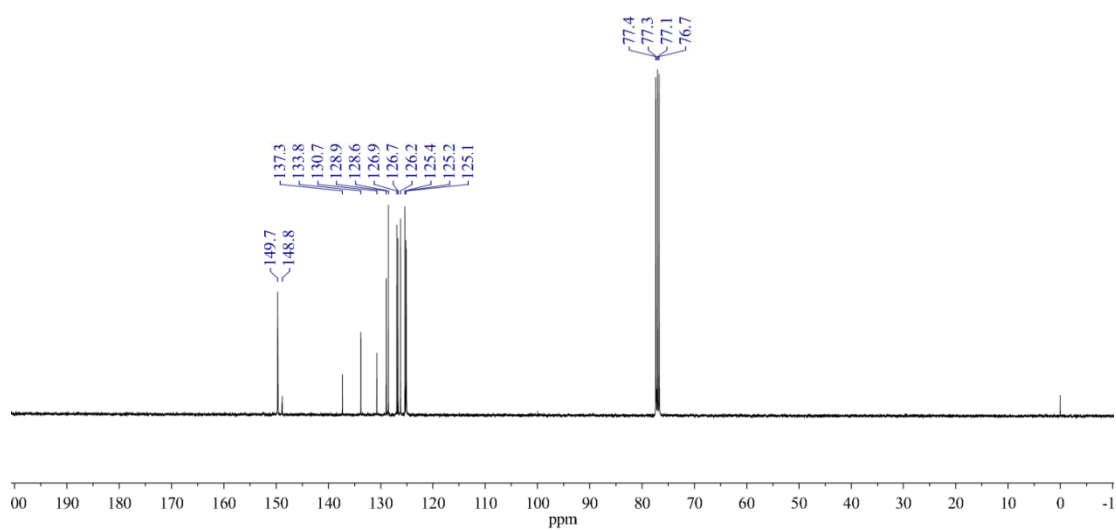

**Figure S19.**  $^1\text{H}$  NMR,  $^{13}\text{C}$  NMR spectra of 4-(naphthalen-2-yl)pyridine (**6n**)

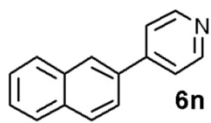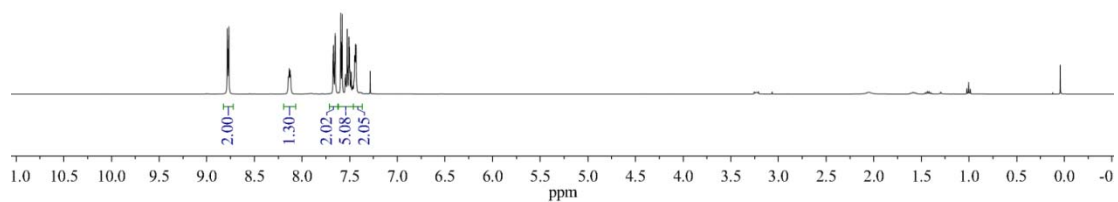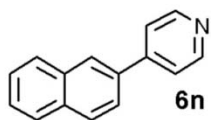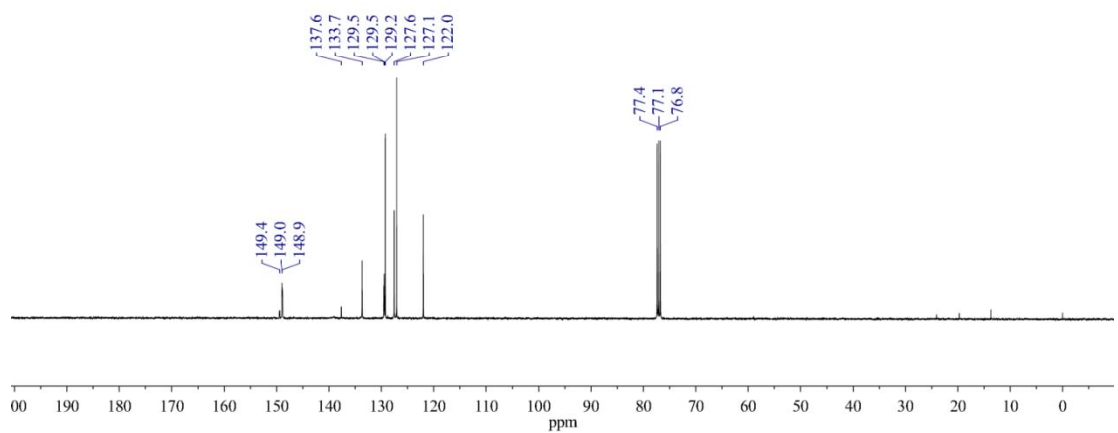

Supplement: c4dt00815d1.pdf [file c4dt00815d1.pdf]
